# Supplementary material for: FLT3-ITD Expression as a Potential Biomarker for the Assessment of Treatment Response in Patients with Acute Myeloid Leukemia
Source: MDPI journal article supplement (doi:10.3390/cancers14164006), 2022-08-19
Supplement: s1 [file s1]

## Supplementary Material

**Table S1.** Demographical, clinical and genetic characteristics of the 46 patients of the diagnosis cohort. PN: patient number of diagnosis cohort. WBC: white blood cell count, Hb: hemoglobin, PLT: platelet count, F: female, M: male, NQ: non-quantifiable AR due to the absence of wild-type allele, NA: not available, NP: not performed, NK: normal karyotype, AK: altered karyotype, CK: complex karyotype, NM: no metaphases.

| PN | Sex | Age | WBC<br>(x10 <sup>9</sup> /L) | Hb<br>(g/dL) | PLT<br>(x10 <sup>9</sup> /L) | Blasts<br>(%) | <i>FLT3-ITD</i><br>DNA | AR<br>cDNA | <i>NPM1</i> | <i>IDH1</i> | <i>IDH2</i> | <i>CEBPA</i> | <i>DNMT3A</i> | Karyotype |
|----|-----|-----|------------------------------|--------------|------------------------------|---------------|------------------------|------------|-------------|-------------|-------------|--------------|---------------|-----------|
| 1  | F   | 75  | 92.5                         | 8.8          | 18                           | 63            | 0.34                   | 0.61       | -           | NP          | NP          | NP           | NP            | NK        |
| 2  | M   | 45  | 202.4                        | 13.4         | 88                           | 70            | 0.87                   | 0.39       | -           | NP          | NP          | NP           | NP            | NK        |
| 3  | F   | 50  | 54.0                         | 9.4          | 19                           | 88            | 0.87                   | 1.06       | +           | NP          | NP          | NP           | NP            | NK        |
| 4  | M   | 71  | 66.0                         | 8.1          | 68                           | 36            | 0.33                   | 0.31       | -           | NP          | NP          | NP           | NP            | NK        |
| 5  | M   | 52  | 50.9                         | 7.9          | 29                           | 88            | 0.43                   | 0.67       | +           | NP          | NP          | NP           | NP            | NK        |
| 6  | F   | 27  | 16.3                         | 8.3          | 65                           | 95            | 0.25/0.56              | 0.22/0.27  | -           | NP          | NP          | NP           | NP            | CK        |
| 7  | M   | 41  | 127.7                        | 7.7          | 115                          | 81            | 0.53                   | 1.2        | -           | NP          | NP          | NP           | NP            | NM        |
| 8  | F   | 32  | 57.0                         | 8.5          | 94                           | 82            | 0.05/0.7               | 0.1/0.6    | +           | NP          | NP          | NP           | NP            | NK        |
| 9  | F   | 37  | 10.1                         | 9.6          | 54                           | 73            | 1.04/0.12              | 4.6/0.7    | +           | -           | NP          | NP           | NP            | NK        |
| 10 | F   | 69  | 230.7                        | 12.4         | 20                           | 72            | 0.57                   | 0.98       | +           | -           | NP          | NP           | NP            | NM        |
| 11 | M   | 87  | 86.7                         | 10.8         | 109                          | NA            | 0.89                   | 0.9        | +           | +           | NP          | NP           | NP            | NM        |
| 12 | M   | 55  | 151.6                        | 13.3         | 34                           | 94            | 0.14/8.31              | NQ/NQ      | +           | -           | NP          | NP           | NP            | NK        |
| 13 | M   | 70  | 60.6                         | 10           | 55                           | 54            | 1.03/5.11              | NQ/NQ      | -           | -           | NP          | NP           | NP            | AK        |
| 14 | F   | 65  | 37.2                         | 8.1          | 36                           | 60            | 0.19/0.2               | 0.4/0.4    | +           | -           | NP          | NP           | NP            | NK        |
| 15 | F   | 91  | 1.1                          | 10.6         | 46                           | 46            | 0.24                   | 0.25       | -           | -           | -           | -            | NP            | NM        |
| 16 | F   | 31  | 153.3                        | 6.8          | 37                           | 84            | 0.9                    | 1.01       | -           | -           | -           | NP           | -             | NM        |
| 17 | F   | 36  | 32.6                         | 9.5          | 60                           | 71            | 0.29/1.26              | 0.43/2.26  | -           | -           | -           | NP           | -             | CK        |
| 18 | M   | 77  | 222.6                        | 7.8          | 85                           | 96            | 0.04                   | 0.06       | +           | -           | -           | NP           | NP            | NK        |
| 19 | M   | 65  | 23.4                         | 11.6         | 107                          | 60            | 0.41                   | 0.99       | +           | -           | -           | NP           | -             | NK        |
| 20 | M   | 72  | 259.0                        | 10.9         | 134                          | 27            | 0.18                   | 0.14       | -           | -           | +           | NP           | -             | NK        |
| 21 | M   | 85  | 0.8                          | 8.8          | 223                          | 55            | 0.25                   | 0.36       | -           | -           | -           | -            | -             | AK        |
| 22 | F   | 59  | 212.5                        | 7.6          | 84                           | 86            | 1.18                   | 3.1        | +           | -           | -           | -            | +             | NK        |
| 23 | M   | 72  | 170.05                       | 10.9         | 52                           | 98            | 0.75                   | 0.9        | +           | -           | -           | -            | -             | NM        |
| 24 | F   | 67  | 28.2                         | 8.9          | 66                           | 45            | 0.15/0.92              | 0.21/0.92  | +           | -           | -           | -            | -             | NK        |
| 25 | M   | 84  | 70.8                         | 9.2          | 86                           | 79            | 0.65/0.7               | 0.64/0.7   | -           | NP          | NP          | NP           | NP            | NM        |
| 26 | F   | 19  | 236.4                        | 11.2         | 44                           | 97            | 9.47                   | 13         | +           | -           | +           | -            | -             | NK        |
| 27 | M   | 85  | 134.8                        | 9.7          | 56                           | NA            | 0.3                    | 0.22       | +           | -           | -           | -            | -             | NM        |
| 28 | F   | 49  | 164.5                        | 13.1         | 79                           | 95            | 0.49/0.55              | 0.36/0.74  | +           | -           | -           | +            | -             | NK        |
| 29 | F   | 90  | 83.7                         | 9.7          | 50                           | 48            | 0.05                   | 0.036      | +           | -           | -           | -            | -             | AK        |
| 30 | M   | 79  | 10.4                         | 11.2         | 994                          | 94            | 1.1                    | 0.99       | -           | -           | -           | -            | -             | NK        |
| 31 | M   | 32  | 9.8                          | 8.7          | 244                          | 42            | 0.29                   | 0.62       | -           | -           | -           | +            | -             | NK        |
| 32 | M   | 27  | 79.4                         | 8.2          | 42                           | 82            | 0.74/0.27              | 1.6/0.5    | -           | -           | -           | -            | -             | NK        |
| 33 | M   | 49  | 110.9                        | 11.5         | 69                           | 93            | 0.11/0.85              | 0.12/0.83  | +           | -           | -           | -            | +             | NK        |
| 34 | F   | 52  | 25.0                         | 7.3          | 70                           | 77            | 0.13                   | 0.18       | -           | -           | -           | -            | -             | NK        |
| 35 | M   | 28  | 115.4                        | 12           | 113                          | 94            | 0.86                   | 0.9        | -           | -           | -           | -            | -             | AK        |
| 36 | F   | 73  | 63.1                         | 9.1          | 89                           | 76            | 0.76                   | 0.85       | +           | -           | -           | +            | +             | NK        |
| 37 | M   | 71  | 1.5                          | 12.4         | 53                           | 44            | 0.3                    | 1          | +           | -           | -           | -            | +             | NM        |
| 38 | M   | 53  | 7.1                          | 12.2         | 328                          | 70            | 0.68                   | 0.6        | +           | -           | -           | -            | +             | NK        |
| 39 | M   | 63  | 211.0                        | 9.5          | 246                          | 92            | 0.94                   | 0.6        | -           | -           | -           | +            | -             | NK        |
| 40 | M   | 59  | 235.3                        | 6.6          | 72                           | 47            | 1.03                   | 9.1        | +           | -           | -           | -            | +             | NK        |
| 41 | F   | 65  | 42.3                         | 8.5          | 24                           | 95            | 0.5/1/5                | 0.6/0.7/12 | -           | -           | -           | -            | +             | NK        |
| 42 | M   | 52  | 76.8                         | 11.3         | 125                          | 75            | 0.88                   | 0.89       | -           | -           | -           | -            | -             | NK        |
| 43 | M   | 37  | 115.1                        | 8.2          | 223                          | 90            | 0.68/0.13              | 0.75/0.14  | +           | -           | -           | -            | +             | NK        |

|    |   |    |      |      |     |    |        |           |   |   |   |   |   |    |
|----|---|----|------|------|-----|----|--------|-----------|---|---|---|---|---|----|
| 44 | F | 60 | 11.5 | 12.8 | 129 | 75 | 0.71   | 1         | + | - | + | - | + | NK |
| 45 | M | 74 | 17.7 | 9.5  | 164 | 97 | 0.11/0 | 0.11/0.01 | + | + | - | - | - | NK |
| 46 | M | 89 | 6.6  | 13   | 81  | 28 | 0.017  | 0.06      | - | - | - | - | - | NK |

**Table S2.** Comparison between DNA and cDNA *FLT3*-ITD mutation ratio during follow-up in the post-allo-HSCT cohort.

\*Patient who relapsed after allo-HSCT. †Day 30 after allo-HSCT sample and pre-relapse sample of patient 2 were the same. PN: patient number of allo-HSCT cohort. Allo-HSCT: allogeneic hematopoietic stem cell transplantation.

| PN  | DNA       |        |             | cDNA     |        |             |
|-----|-----------|--------|-------------|----------|--------|-------------|
|     | pre-HSCT  | Day 30 | Pre-relapse | pre-HSCT | Day 30 | Pre-relapse |
| 1*  | 0         | 0      | 0.03        | 0.93     | 0      | 0.14        |
| 2*  | 0         | 0*     | 0           | 0        | 0*     | 0           |
| 3*  | 0         | 0      | 0           | 0        | 0      | 0           |
| 4*  | 0         | 0      | 0           | 0.1      | 0      | 0.16        |
| 5*  | 0         | 0      | 0           | 0        | 0      | 0           |
| 6*  | 0.19      | 0      | 0.03        | 0.9      | 0      | 0.53        |
| 7*  | 0         | 0      | 0           | 0        | 0      | 0.03        |
| 8*  | 0         | 0      | 0           | 0.04     | 0      | 0.57        |
| 9*  | 0         | 0      | 0.02        | 0        | 0      | 0.28        |
| 10* | 0         | 0      | 0.04        | 0        | 0      | 0.47        |
| 11* | 0         | 0      | 0.02        | 0        | 0      | 0.24        |
| 12* | 0         | 0      | 0           | 0        | 0      | 0.05        |
| 13  | 0         | 0      | -           | 0.03     | 0      | -           |
| 14  | 0         | 0      | -           | 0.04     | 0      | -           |
| 15  | 0         | 0      | -           | 0.05     | 0      | -           |
| 16  | 0.01/0.03 | 0      | -           | 0        | 0      | -           |
| 17  | 0         | 0      | -           | 0        | 0      | -           |
| 18  | 0         | 0      | -           | 0        | 0      | -           |
| 19  | 0         | 0      | -           | 0        | 0      | -           |
| 20  | 0         | 0      | -           | 0        | 0      | -           |
| 21  | 0         | 0      | -           | 0        | 0      | -           |
| 22  | 0         | 0      | -           | 0        | 0      | -           |
| 23  | 0         | 0      | -           | 0        | 0      | -           |
| 24  | 0         | 0      | -           | 0        | 0      | -           |
| 25  | 0         | 0      | -           | 0        | 0      | -           |
| 26  | 0         | 0      | -           | 0        | 0      | -           |
| 27  | 0         | 0      | -           | 0        | 0      | -           |
| 28  | 0         | 0      | -           | 0        | 0      | -           |
| 29  | 0         | 0      | -           | 0        | 0      | -           |
| 30  | 0         | 0      | -           | 0        | 0      | -           |
| 31  | 0         | 0      | -           | 0        | 0      | -           |
| 32  | 0         | 0      | -           | 0        | 0      | -           |
| 33  | 0         | 0      | -           | 0        | 0      | -           |
| 34  | 0         | 0      | -           | 0        | 0      | -           |
